# Supplementary material
Source: publisher figshare collection journal article supplement (https://tandf.figshare.com/articles/dataset/_/11952384)
Supplement: Supplementary file 1 [file 1]

Archive with 6 entries (6 files):
- iart_a_1729753_sm4061.pdf
- iart_a_1729753_sm4060.pdf
- iart_a_1729753_sm4059.pdf
- iart_a_1729753_sm4058.xlsx
- iart_a_1729753_sm4057.pdf
- iart_a_1729753_sm4056.pdf
