# Supplementary material
Source: publisher figshare collection journal article supplement (https://tandf.figshare.com/articles/dataset/_/11952384)
Supplement: Supplementary file 1 [file 1 › iart_a_1729753_sm4056.pdf]

# Supplementary 1 Search strategy

PsycINFO via EBSCO October 17, 2018

Title: Gambling: educational programs and consumer protection

| Search terms                             |                                                                                                                                                                                                                                                                                                                                                                                                                                                                                                                                                                                                                                                                                                                                                                                                                                                                                                                                                                                                                                                                                                                                                                                                                                                                                                                          | Items found |
|------------------------------------------|--------------------------------------------------------------------------------------------------------------------------------------------------------------------------------------------------------------------------------------------------------------------------------------------------------------------------------------------------------------------------------------------------------------------------------------------------------------------------------------------------------------------------------------------------------------------------------------------------------------------------------------------------------------------------------------------------------------------------------------------------------------------------------------------------------------------------------------------------------------------------------------------------------------------------------------------------------------------------------------------------------------------------------------------------------------------------------------------------------------------------------------------------------------------------------------------------------------------------------------------------------------------------------------------------------------------------|-------------|
| <b>Population: Gambling</b>              |                                                                                                                                                                                                                                                                                                                                                                                                                                                                                                                                                                                                                                                                                                                                                                                                                                                                                                                                                                                                                                                                                                                                                                                                                                                                                                                          |             |
| 1.                                       | DE "Gambling" OR DE "Pathological Gambling"                                                                                                                                                                                                                                                                                                                                                                                                                                                                                                                                                                                                                                                                                                                                                                                                                                                                                                                                                                                                                                                                                                                                                                                                                                                                              | 7,961       |
| 2.                                       | TI (gambl*) OR KW(gambl*)                                                                                                                                                                                                                                                                                                                                                                                                                                                                                                                                                                                                                                                                                                                                                                                                                                                                                                                                                                                                                                                                                                                                                                                                                                                                                                | 7,382       |
| 3.                                       | TI(roulette OR "casino*" OR "poker" OR "electronic blackjack" OR "gaming machine*" OR "slot machine*" OR pokie* OR "fruit machine" OR "bingo" OR betting OR "bets" OR "keno" OR lottery OR lotteries OR "lotto" OR "football pool*" OR wagering ) OR KW(betting OR roulette OR "casino*" OR "poker" OR "electronic blackjack" OR "gaming machine*" OR "slot machine*" OR pokie* OR "fruit machine" OR "bingo" OR betting OR "bets" OR "keno" OR lottery OR lotteries OR "lotto" OR "football pool*" OR wagering) OR AB(betting OR roulette OR "casino*" OR "poker" OR "electronic blackjack" OR "gaming machine*" OR "slot machine*" OR pokie* OR "fruit machine" OR "bingo" OR "sports bet*" OR "keno" OR lottery OR lotteries OR "lotto" OR "football pool*" OR wagering)                                                                                                                                                                                                                                                                                                                                                                                                                                                                                                                                              | 4,227       |
| 4.                                       | 1 OR 2 OR 3                                                                                                                                                                                                                                                                                                                                                                                                                                                                                                                                                                                                                                                                                                                                                                                                                                                                                                                                                                                                                                                                                                                                                                                                                                                                                                              | 10,681      |
| <b>Intervention: Education</b>           |                                                                                                                                                                                                                                                                                                                                                                                                                                                                                                                                                                                                                                                                                                                                                                                                                                                                                                                                                                                                                                                                                                                                                                                                                                                                                                                          |             |
| 5.                                       | DE "Health Education" OR DE "Health Promotion" OR DE "Educational Programs" OR DE "Tutoring" OR DE "Personnel Training" OR DE "Inservice Training" OR DE "On the Job Training" OR DE "Program Evaluation" OR DE "Prevention" OR DE "Preventive Medicine"                                                                                                                                                                                                                                                                                                                                                                                                                                                                                                                                                                                                                                                                                                                                                                                                                                                                                                                                                                                                                                                                 | 83,003      |
| 6.                                       | TI((((("school based" OR "family based" OR "community based" OR gambling) AND (program* OR educat* OR train*)) OR (prevent* AND (primary OR secondary OR universal OR gambling OR educat* OR program*)) OR educat* OR "inservice training" OR ((staff OR employ* OR person* OR work-force*) N4 (train* OR performance*)) OR "Stacked Deck" OR "B.E.S.T. Teen Program" OR "BEST Teen Program")) OR KW((((("school based" OR "family based" OR "community based" OR gambling) N4 (program* OR educat* OR train*)) OR (prevent* AND (primary OR secondary OR universal OR gambling OR educat* OR program*)) OR educat* OR "inservice training" OR ((staff OR employ* OR person* OR work-force*) N4 (train* OR performance*)) OR "Stacked Deck" OR "B.E.S.T. Teen Program" OR "BEST Teen Program")) OR AB((((("school based" OR "family based" OR "community based" OR gambling) N4 (program* OR educat* OR train*)) OR (prevent* N15 (primary OR secondary OR universal OR gambling OR educat* OR program*)) OR "inservice training" OR ((staff OR employ* OR person* OR work-force*) N4 (train* OR performance*)) OR "Stacked Deck" OR "B.E.S.T. Teen Program" OR "BEST Teen Program"))                                                                                                                                    | 303,159     |
| 7.                                       | 5 OR 6                                                                                                                                                                                                                                                                                                                                                                                                                                                                                                                                                                                                                                                                                                                                                                                                                                                                                                                                                                                                                                                                                                                                                                                                                                                                                                                   | 351,102     |
| <b>Intervention: Consumer protection</b> |                                                                                                                                                                                                                                                                                                                                                                                                                                                                                                                                                                                                                                                                                                                                                                                                                                                                                                                                                                                                                                                                                                                                                                                                                                                                                                                          |             |
| 8.                                       | DE "Consumer Education" OR DE "Warnings" OR DE "Warning Labels" OR DE "Consumer Protection" OR DE "Harm Reduction"                                                                                                                                                                                                                                                                                                                                                                                                                                                                                                                                                                                                                                                                                                                                                                                                                                                                                                                                                                                                                                                                                                                                                                                                       | 5,754       |
| 9.                                       | TI(((time N3 limit*) OR (break* N2 play*) OR "pop-up" OR popup OR popups OR (static W2 messag*) OR (dynamic W2 messag*) OR ("self-appraisal" w2 messag*) OR (warning N2 (messag* OR system*)) OR (health W2 messag*) OR (intervention N2 messag*) OR "coin toss" OR cointoss* OR (monetary N2 limit*) OR (speed N2 betting) OR cashless OR card-based OR (note W2 acceptor*) OR "self exclusion" OR (persuasive N2 design) OR (behavior W2 feedback) OR "personalized feedback" OR mentor OR (harm W2 minimi*) OR "harm reduction" OR "consumer harm" OR (player N2 protect*) OR (player N2 tracking) OR "social responsibility" OR "responsible gambling" OR (gambl* W2 responsibl*) OR (protective W2 behavio*) OR (behavior* W2 track*) OR ("harm reduction" N15 gambl*) OR playscan OR "play scan" OR "RG tool" OR "colour-coded risk rating" OR "Limited cash flow" OR "prohibition of note acceptors" OR "video lottery terminal banner" OR "warning banner*") OR KW(((time N3 limit*) OR (break* N2 play*) OR "pop-up" OR popup OR popups OR (static W2 messag*) OR (dynamic W2 messag*) OR ("self-appraisal" w2 messag*) OR (warning N2 (messag* OR system*)) OR (health W2 messag*) OR (intervention N2 messag*) OR "coin toss" OR cointoss* OR (monetary N2 limit*) OR (speed N2 betting) OR cashless OR card- | 38,029      |

|                      |                                                                                                                                                                                                                                                                                                                                                                                                                                                                                                                                                                                                                                                                                                                                                                                                                                                                                                                                                                                                                                                                                                                                                                                                                                                                                                                                                                                                                                                                                                                                                                                                                                                |              |
|----------------------|------------------------------------------------------------------------------------------------------------------------------------------------------------------------------------------------------------------------------------------------------------------------------------------------------------------------------------------------------------------------------------------------------------------------------------------------------------------------------------------------------------------------------------------------------------------------------------------------------------------------------------------------------------------------------------------------------------------------------------------------------------------------------------------------------------------------------------------------------------------------------------------------------------------------------------------------------------------------------------------------------------------------------------------------------------------------------------------------------------------------------------------------------------------------------------------------------------------------------------------------------------------------------------------------------------------------------------------------------------------------------------------------------------------------------------------------------------------------------------------------------------------------------------------------------------------------------------------------------------------------------------------------|--------------|
|                      | based OR (note W2 acceptor*) OR "self exclusion" OR (persuasive N2 design) OR (behavior W2 feedback) OR "personalized feedback" OR mentor OR (harm W2 minimi*) OR "harm reduction" OR "consumer harm" OR (player N2 protect*) OR (player N2 tracking) OR "social responsibility" OR "responsible gambling" OR (gambl* W2 responsibl*) OR (protective W2 behavio*) OR (behavior* W2 track*) OR ("harm reduction" N15 gambl*) OR playscan OR "play scan" OR "RG tool" OR "colour-coded risk rating" OR "Limited cash flow" OR "prohibition of note acceptors" OR "video lottery terminal banner" OR "warning banner*") OR AB((time N3 limit*) OR (break* N2 play*) OR "pop-up" OR popup OR popups OR (static W2 messag*) OR (dynamic W2 messag*) OR ("self-appraisal" w2 messag*) OR (warning N2 (messag* OR system*)) OR (health W2 messag*) OR (intervention N2 messag*) OR "coin toss" OR cointoss* OR (monetary N2 limit*) OR (speed N2 betting) OR cashless OR card-based OR (note W2 acceptor*) OR "self exclusion" OR (persuasive N2 design) OR (behavior W2 feedback) OR "personalized feedback" OR mentor* OR (harm W2 minimi*) OR "harm reduction" OR "consumer harm" OR (player N2 protect*) OR (player N2 tracking) OR "social responsibility" OR "responsible gambling" OR (gambl* W2 responsibl*) OR (protective W2 behavio*) OR (behavior* W2 track*) OR playscan OR "play scan" OR "RG tool" OR "colour-coded risk rating" OR "Limited cash flow" OR "prohibition of note acceptors" OR "video lottery terminal banner*" OR "warning banner*")                                                                                   |              |
| 10.                  | 8 OR 9                                                                                                                                                                                                                                                                                                                                                                                                                                                                                                                                                                                                                                                                                                                                                                                                                                                                                                                                                                                                                                                                                                                                                                                                                                                                                                                                                                                                                                                                                                                                                                                                                                         | 41,192       |
| <b>Study types</b>   |                                                                                                                                                                                                                                                                                                                                                                                                                                                                                                                                                                                                                                                                                                                                                                                                                                                                                                                                                                                                                                                                                                                                                                                                                                                                                                                                                                                                                                                                                                                                                                                                                                                |              |
| 11.                  | DE "Random Sampling" OR DE "Experimental Design" OR DE "Between Groups Design" OR DE "Clinical Trials" OR DE "Cohort Analysis" OR DE "Followup Studies" OR DE "Longitudinal Studies" OR DE "Repeated Measures" OR DE "Posttesting" OR DE "Pretesting" OR DE "Quasi Experimental Methods" OR DE "Treatment Effectiveness Evaluation" OR ZC "meta analysis" OR DE "Meta Analysis" OR ZC "longitudinal study" OR ZC "prospective study" OR ZC "retrospective study"                                                                                                                                                                                                                                                                                                                                                                                                                                                                                                                                                                                                                                                                                                                                                                                                                                                                                                                                                                                                                                                                                                                                                                               | 235,493      |
| 12.                  | TI (randomiz* OR randomis* OR randomly OR trial* OR (controlled W2 stud*) OR (random W2 sample) OR "laboratory setting*" OR experiment* OR "matched sample" OR "matched control*" OR metaanaly* OR (meta w1 analy*) OR "empirical evidence" OR longitudinal* OR cohort* OR (case w1 control*) OR (observation* w1 stud*) OR prospectiv* OR retrospectiv* OR (follow w1 up) OR prepost* OR (pre w1 post*) OR (pre w1 test*) OR pretest* OR (post w1 test*) OR posttest* OR (program* w1 evalut*) OR survey* OR ("real-world" N2 setting*)) OR KW(randomiz* OR randomis* OR randomly OR trial* OR (controlled W2 stud*) OR (random W2 sample) OR "matched control*" OR "laboratory setting*" OR experiment* OR "matched sample" OR metaanaly* OR (meta w1 analy*) OR "empirical evidence" OR longitudinal* OR cohort* OR (case w1 control*) OR (observation* w1 stud*) OR prospectiv* OR retrospectiv* OR (follow w1 up) OR prepost* OR (pre w1 post*) OR (pre w1 test*) OR pretest* OR (post w1 test*) OR posttest* OR (program* w1 evalut*) OR survey* OR ("real-world" N2 setting*)) OR AB (randomiz* OR randomis* OR randomly OR trial* OR (controlled W2 stud*) OR (random W2 sample) OR "laboratory setting*" OR experiment* OR "matched sample" OR metaanaly* OR (meta w1 analy*) OR "empirical evidence" OR longitudinal* OR cohort* OR (case w1 control*) OR (observation* w1 stud*) OR prospectiv* OR retrospectiv* OR (follow w1 up) OR prepost* OR (pre w1 post*) OR (pre w1 test*) OR pretest* OR (post w1 test*) OR posttest* OR (program* w1 evalut*) OR "repeated-measures experiment" OR survey* OR ("real-world" N2 setting*)) | 1,172,113    |
| 13.                  | 11 OR 12                                                                                                                                                                                                                                                                                                                                                                                                                                                                                                                                                                                                                                                                                                                                                                                                                                                                                                                                                                                                                                                                                                                                                                                                                                                                                                                                                                                                                                                                                                                                                                                                                                       | 1,229,977    |
| <b>Limits</b>        |                                                                                                                                                                                                                                                                                                                                                                                                                                                                                                                                                                                                                                                                                                                                                                                                                                                                                                                                                                                                                                                                                                                                                                                                                                                                                                                                                                                                                                                                                                                                                                                                                                                |              |
| 14.                  | <b>Limiters</b> - Peer Reviewed; Publication Type: Peer Reviewed Journal; Language: Danish, English, Norwegian, Swedish;                                                                                                                                                                                                                                                                                                                                                                                                                                                                                                                                                                                                                                                                                                                                                                                                                                                                                                                                                                                                                                                                                                                                                                                                                                                                                                                                                                                                                                                                                                                       |              |
| <b>Combined sets</b> |                                                                                                                                                                                                                                                                                                                                                                                                                                                                                                                                                                                                                                                                                                                                                                                                                                                                                                                                                                                                                                                                                                                                                                                                                                                                                                                                                                                                                                                                                                                                                                                                                                                |              |
| 15.                  | <b>4 AND 13 AND 14</b>                                                                                                                                                                                                                                                                                                                                                                                                                                                                                                                                                                                                                                                                                                                                                                                                                                                                                                                                                                                                                                                                                                                                                                                                                                                                                                                                                                                                                                                                                                                                                                                                                         | <b>3,275</b> |
| 16.                  | <b>4 AND 7 AND 14</b>                                                                                                                                                                                                                                                                                                                                                                                                                                                                                                                                                                                                                                                                                                                                                                                                                                                                                                                                                                                                                                                                                                                                                                                                                                                                                                                                                                                                                                                                                                                                                                                                                          | <b>722</b>   |
| 17.                  | <b>4 AND 10 AND 14</b>                                                                                                                                                                                                                                                                                                                                                                                                                                                                                                                                                                                                                                                                                                                                                                                                                                                                                                                                                                                                                                                                                                                                                                                                                                                                                                                                                                                                                                                                                                                                                                                                                         | <b>384</b>   |
| 18.                  | <b>15 OR 16 OR 17 Duplicate references discarded in EndNote</b>                                                                                                                                                                                                                                                                                                                                                                                                                                                                                                                                                                                                                                                                                                                                                                                                                                                                                                                                                                                                                                                                                                                                                                                                                                                                                                                                                                                                                                                                                                                                                                                |              |

The search result, usually found at the end of the documentation, forms the list of abstracts.

AB = Abstract

AU = Author

DE = Term from the thesaurus

MM = Major Concept

TI = Title

TX = All Text. Performs a keyword search of all the database's searchable fields

ZC = Methodology Index

\* = Truncation

" " = Citation Marks; searches for an exact phrase
