# Supplementary material
Source: publisher figshare collection journal article supplement (https://tandf.figshare.com/articles/dataset/_/11952384)
Supplement: Supplementary file 1 [file 1 › iart_a_1729753_sm4057.pdf]

## Supplementary 2 -Excluded studies

| Reference                                                                                                                                                                                                                                | Main reason for exclusion |
|------------------------------------------------------------------------------------------------------------------------------------------------------------------------------------------------------------------------------------------|---------------------------|
| Abarbanel B, Bernhard B, Singh AK, Lucas A. Impact of virtual atmospherics and functional qualities on the online gambler's experience. Behaviour & Information Technology, 2015; 34 (10): 1005-21.                                      | Irrelevant intervention   |
| Abbott M, Hodgins DC, Bellringer M, Vandal AC, Palmer Du Preez K, Landon J, et al. Brief telephone interventions for problem gambling: a randomized controlled trial. Addiction, 2018; 113 (5): 883-95.                                  | Irrelevant intervention   |
| Ariyabuddhiphongs V, Phengphol V. Near miss, gambler's fallacy and entrapment: their influence on lottery gamblers in Thailand. J Gambl Stud, 2008; 24 (3): 295-305.                                                                     | Not a primary study       |
| Ariyabuddhiphongs V. Problem gambling prevention: Before, during, and after measures. International Journal of Mental Health and Addiction, 2013; 11 (5): 568-82.                                                                        | Irrelevant intervention   |
| Armstrong AR, Thomas A, Abbott M. Gambling Participation, Expenditure and Risk of Harm in Australia, 1997-1998 and 2010-2011. Journal of Gambling Studies, 2018; 34 (1): 255-74.                                                         | Irrelevant intervention   |
| Armstrong T, Donaldson P, Langham E, Rockloff M, Browne M. Exploring the Effectiveness of an Intelligent Messages Framework for Developing Warning Messages to Reduce Gambling Intensity. Journal of Gambling Issues, 2018; (38): 67-84. | Irrelevant intervention   |
| Auer MM, Griffiths MD. The use of personalized behavioral feedback for online gamblers: An empirical study. Frontiers in Psychology, 2015; 6.                                                                                            | Other reason              |
| Benhsain K, Taillefer A, Ladouceur R. Awareness of independence of events and erroneous perceptions while gambling. Addictive Behaviors, 2004; 29 (2): 399-404.                                                                          | Too few participants      |
| Bergen AE, Newby-Clark IR, Brown A. Gambling increases self-control strength in problem gamblers. J Gambl Stud, 2014; 30 (1): 153-62.                                                                                                    | Irrelevant intervention   |
| Billieux J, Van der Linden M, Khazaal Y, Zullino D, Clark L. Trait gambling cognitions predict near-miss experiences and persistence in laboratory slot machine gambling. Br J Psychol, 2012; 103 (3): 412-27.                           | Duplicate                 |
| Billieux J, Van der Linden M, Khazaal Y, Zullino D, Clark L. Trait gambling cognitions predict near-miss experiences and persistence in laboratory slot machine gambling. British Journal of Psychology, 2012; 103 (3): 412-27.          | Irrelevant intervention   |
| Binde P, Romild U. Self-Reported Negative Influence of Gambling Advertising in a Swedish Population-Based Sample. J Gambl Stud, 2018.                                                                                                    | Irrelevant intervention   |
| Bjelde K, Chromy B, Pankow D. Casino Gambling Among Older Adults in North Dakota: A Policy Analysis. Journal of Gambling Studies, 2008; 24 (4): 423-40.                                                                                  | Irrelevant study design   |
| Blaszczynski A, Cowley E, Anthony C, Hinsley K. Breaks in Play: Do They Achieve Intended Aims? J Gambl Stud, 2016; 32 (2): 789-800.                                                                                                      | Irrelevant outcome        |

|                                                                                                                                                                                                                                                   |                         |
|---------------------------------------------------------------------------------------------------------------------------------------------------------------------------------------------------------------------------------------------------|-------------------------|
| Blaszczynski A, Drobny J, Steel Z. Home-Based Imaginal Desensitisation in Pathological Gambling: Short-Term Outcomes. <i>Behaviour Change</i> , 2005; 22 (1): 13-21.                                                                              | Irrelevant intervention |
| Blaszczynski A, Gainsbury S, Karlov L. Blue gum gaming machine: An evaluation of responsible gambling features. <i>Journal of Gambling Studies</i> , 2014; 30 (3): 697-712.                                                                       | Irrelevant outcome      |
|                                                                                                                                                                                                                                                   | Not a primary study     |
| Blaszczynski A, Ladouceur R, Nower L. Self-exclusion: A proposed gateway to treatment model. <i>International Gambling Studies</i> , 2007; 7 (1): 59-71.                                                                                          |                         |
| Boudreault C, Giroux I, Jacques C, Goulet A, Simoneau H, Ladouceur R. Efficacy of a Self-Help Treatment for At-Risk and Pathological Gamblers. <i>J Gambl Stud</i> , 2018; 34 (2): 561-80.                                                        | Irrelevant intervention |
| Boughton R, Jindani F, Turner NE. Closing a treatment gap in Ontario: Pilot of a Tutorial Workbook for women gamblers. <i>Journal of Gambling Issues</i> , 2017; 36:199-231.                                                                      | Too few participants    |
| Boughton RR, Jindani F, Turner NE. Group treatment for women gamblers using web, teleconference and workbook: Effectiveness pilot. <i>International Journal of Mental Health and Addiction</i> , 2016; 14 (6): 1074-95.                           | Irrelevant intervention |
| Bramley S, Dibben N, Rowe R. Investigating the influence of music tempo on arousal and behaviour in laboratory virtual roulette. <i>Psychology of Music</i> , 2016; 44 (6): 1389-403.                                                             | Irrelevant intervention |
| Brandt AE, Szykiel H, Pietras CJ. Laboratory simulated gambling: Risk varies across participant-stake procedure. <i>Journal of General Psychology</i> , 2013; 140 (2): 130-43.                                                                    | Irrelevant intervention |
|                                                                                                                                                                                                                                                   | Irrelevant intervention |
| Breen H, Buultjens J, Hing N. Evaluating Implementation of a Voluntary Responsible Gambling Code in Queensland, Australia. <i>eCOMMUNITY: International Journal of Mental Health &amp; Addiction</i> , 2005; 3 (1): 15-25.                        |                         |
| Breen H, Buultjens J, Hing N. Implementing Responsible Gambling Practices in a Regional Area. <i>Journal of Hospitality and Tourism Management</i> , 2006; 13 (1): 23-43.                                                                         | Irrelevant intervention |
| Breen H, Buultzens J, Hing N. The Responsible Gambling Code in Queensland, Australia: Implementation and Venue Assessment. <i>UNLV Gaming Research &amp; Review Journal</i> , 2005; 9 (1): 43-60.                                                 | Irrelevant study design |
| Brevers D, Bechara A, Kilts CD, Antoniali V, Bruylant A, Verbanck P, et al. Competing Motivations: Proactive Response Inhibition Toward Addiction-Related Stimuli in Quitting-Motivated Individuals. <i>J Gambl Stud</i> , 2018; 34 (3): 785-806. | Irrelevant intervention |
| Brevers D, Noël X, Bechara A, Vanavermaete N, Verbanck P, Kornreich C. Effect of casino-related sound, Red light and Pairs on decision-making during the Iowa Gambling Task. <i>Journal of Gambling Studies</i> , 2015; 31 (2): 409-21.           | Irrelevant intervention |
| Brevers D, Noel X, Clark L, Zyuzin J, Justin Park J, Bechara A. The impact of precommitment on risk-taking while gambling: A preliminary study. <i>J Behav Addict</i> , 2016; 5 (1): 51-58.                                                       | Irrelevant intervention |
| Broda A, LaPlante DA, Nelson SE, LaBrie RA, Bosworth LB, Shaffer HJ. Virtual harm reduction efforts for internet gambling: Effects of deposit limits on actual Internet sports gambling behavior. <i>Harm Reduction Journal</i> , 2008; 5.        | Irrelevant intervention |

|                                                                                                                                                                                                                                                                         |                         |
|-------------------------------------------------------------------------------------------------------------------------------------------------------------------------------------------------------------------------------------------------------------------------|-------------------------|
| Buchner UG, Koytek A, Wodarz N, Wolstein J. Is an e-mental health programme a viable way to reach affected others of disordered gamblers? A feasibility study focusing on access and retention. <i>International Gambling Studies</i> , 2018.                           | Irrelevant outcome      |
| Bucker L, Bierbrodt J, Hand I, Wittekind C, Moritz S. Effects of a depression-focused internet intervention in slot machine gamblers: A randomized controlled trial. <i>PLoS One</i> , 2018; 13 (6): e0198859.                                                          | Irrelevant intervention |
| Calderwood KA, Wellington WJ. Using Roadside Billboard Posters to Increase Admission Rates to Problem Gambling Services: Reflections on Failure. <i>Health Promot Pract</i> , 2015; 16 (4): 510-22.                                                                     | Not a primary study     |
| Campos MD, Rosenthal RJ, Chen Q, Moghaddam J, Fong TW. A self-help manual for problem gamblers: The impact of minimal therapist guidance on outcome. <i>International Journal of Mental Health and Addiction</i> , 2016; 14 (4): 579-96.                                | Irrelevant intervention |
| Caron A, Ladouceur R. Erroneous verbalizations and risk taking at video lotteries. <i>Br J Psychol</i> , 2003; 94:189-94.                                                                                                                                               | Irrelevant intervention |
| Casey LM, Oei TPS, Raylu N, Horrigan K, Day J, Ireland M, et al. Internet-Based Delivery of Cognitive Behaviour Therapy Compared to Monitoring, Feedback and Support for Problem Gambling: A Randomised Controlled Trial. <i>J Gambl Stud</i> , 2017; 33 (3): 993-1010. | Irrelevant population   |
| Chiou W-B, Wan C-S. Using cognitive dissonance to induce adolescents' escaping from the claw of online gaming: The roles of personal responsibility and justification of cost. <i>CyberPsychology &amp; Behavior</i> , 2007; 10 (5): 663-70.                            | Irrelevant intervention |
| Chóliz M. Experimental analysis of the game in pathological gamblers: Effect of the immediacy of the reward in slot machines. <i>Journal of Gambling Studies</i> , 2010; 26 (2): 249-56.                                                                                | Too few participants    |
| Chóliz M. The challenge of online gambling: The effect of legalization on the increase in online gambling addiction. <i>Journal of Gambling Studies</i> , 2016; 32 (2): 749-56.                                                                                         | Irrelevant intervention |
| Christopherson KM, Weatherly JN. The effect of visual complexity when playing a slot-machine simulation: The role of computer experience, computer anxiety, and optimism. <i>Computers in Human Behavior</i> , 2006; 22 (6): 1072-79.                                   | Irrelevant intervention |
| Clark GI, Rock AJ, McKeith CFA, Coventry WL. Cue-reactive rationality, visual imagery and volitional control predict cue-reactive urge to gamble in poker-machine gamblers. <i>Journal of Gambling Studies</i> , 2017; 33 (3): 807-23.                                  | Too few participants    |
| Clark L, Lawrence AJ, Astley-Jones F, Gray N. Gambling near-misses enhance motivation to gamble and recruit win-related brain circuitry. <i>Neuron</i> , 2009; 61 (3): 481-90.                                                                                          | Irrelevant intervention |
| Clark L, Liu R, McKavanagh R, Garrett A, Dunn BD, Aitken MRF. Learning and affect following near-miss outcomes in simulated gambling. <i>Journal of Behavioral Decision Making</i> , 2013; 26 (5): 442-50.                                                              | Irrelevant intervention |

|                                                                                                                                                                                                                                                    |                         |
|----------------------------------------------------------------------------------------------------------------------------------------------------------------------------------------------------------------------------------------------------|-------------------------|
| Clemens F, Hanewinkel R, Morgenstern M. Exposure to Gambling Advertisements and Gambling Behavior in Young People. <i>J Gambl Stud</i> , 2017; 33 (1): 1-13.                                                                                       | Irrelevant intervention |
| Cloutier M, Ladouceur R, Sevigny S. Responsible gambling tools: pop-up messages and pauses on video lottery terminals. <i>J Psychol</i> , 2006; 140 (5): 434-8.                                                                                    | Irrelevant outcome      |
| Coates E, Blaszczynski A. Predictors of return rate discrimination in slot machine play. <i>J Gambl Stud</i> , 2014; 30 (3): 669-83.                                                                                                               | Irrelevant intervention |
| Cole T, Barrett DJK, Griffiths MD. Social facilitation in online and offline gambling: A pilot study. <i>International Journal of Mental Health and Addiction</i> , 2011; 9 (3): 240-47.                                                           | Irrelevant intervention |
| Côté D, Caron A, Aubert J, Desrochers V, Ladouceur R. Near Wins Prolong Gambling on a Video Lottery Terminal. <i>Journal of Gambling Studies</i> , 2003; 19 (4): 433-38.                                                                           | Irrelevant intervention |
| Crewe-Brown C, Blaszczynski A, Russell A. Prize level and debt size: Impact on gambling behaviour. <i>Journal of Gambling Studies</i> , 2014; 30 (3): 639-51.                                                                                      | Irrelevant intervention |
| Cummins LF, Nadorff MR, Kelly AE. Winning and positive affect can lead to reckless gambling. <i>Psychol Addict Behav</i> , 2009; 23 (2): 287-94.                                                                                                   | Irrelevant intervention |
| Cunningham JA, Hodgins DC, Toneatto T, Rai A, Cordingley J. Pilot study of a personalized feedback intervention for problem gamblers. <i>Behav Ther</i> , 2009; 40 (3): 219-24.                                                                    | Irrelevant intervention |
| Cunningham JA, Hodgins DC, Toneatto T. Pilot study of an Internet-based personalized feedback intervention for problem gamblers. <i>Journal of Gambling Issues</i> , 2011; 263-10.                                                                 | Irrelevant intervention |
| Delfabbro P. Evaluating the effectiveness of a limited reduction in electronic gaming machine availability on perceived gambling behaviour and objective expenditure. <i>International Gambling Studies</i> , 2008; 8 (2): 151-65.                 | Irrelevant intervention |
| Derevensky J, Sklar A, Gupta R, Messerlian C. An empirical study examining the impact of gambling advertisements on adolescent gambling attitudes and behaviors. <i>International Journal of Mental Health and Addiction</i> , 2010; 8 (1): 21-34. | Irrelevant intervention |
| Devos G, Clark L, Maurage P, Billieux J. Induced sadness increases persistence in a simulated slot machine task among recreational gamblers. <i>Psychol Addict Behav</i> , 2018; 32 (3): 383-88.                                                   | Irrelevant intervention |
| Dixon L, Trigg R, Griffiths M. An empirical investigation of music and gambling behaviour. <i>International Gambling Studies</i> , 2007; 7 (3): 315-26.                                                                                            | Irrelevant intervention |
| Dixon MJ, Collins K, Harrigan KA, Graydon C, Fugelsang JA. Using sound to unmask losses disguised as wins in multiline slot machines. <i>J Gambl Stud</i> , 2015; 31 (1): 183-96.                                                                  | Irrelevant intervention |
| Dixon MJ, Harrigan KA, Santesso DL, Graydon C, Fugelsang JA, Collins K. The impact of sound in modern multiline video slot machine play. <i>J Gambl Stud</i> , 2014; 30 (4): 913-29.                                                               | Irrelevant intervention |

|                                                                                                                                                                                                                                                                  |                         |
|------------------------------------------------------------------------------------------------------------------------------------------------------------------------------------------------------------------------------------------------------------------|-------------------------|
| Dixon MJ, MacLaren V, Jarick M, Fugelsang JA, Harrigan KA. The frustrating effects of just missing the jackpot: slot machine near-misses trigger large skin conductance responses, but no post-reinforcement pauses. <i>J Gambl Stud</i> , 2013; 29 (4): 661-74. | Irrelevant intervention |
| Dixon MR, Nastally BL, Jackson JE, Habib R. Altering the near-miss effect in slot machine gamblers. <i>J Appl Behav Anal</i> , 2009; 42 (4): 913-8.                                                                                                              | Irrelevant intervention |
| Dixon MR, Paulson KN, Nastally BL. RECREATIONAL AND PATHOLOGICAL GAMBLERS' PREFERENCES FOR SLOT MACHINES YIELDING UNEQUAL REINFORCEMENT. <i>Analysis of Gambling Behavior</i> , 2010; 4 (2): 88-102.                                                             | Other reason            |
| Dixon MR, Schreiber JE. Near-miss effects on response latencies and win estimations of slot machine players. <i>The Psychological Record</i> , 2004; 54 (3): 335-48.                                                                                             | Irrelevant intervention |
| Donaldson P, Langham E, Rockloff M, Browne M, Rockloff MJ. Veiled EGM Jackpots: The Effects of Hidden and Mystery Jackpots on Gambling Intensity. <i>Journal of Gambling Studies</i> , 2016; 32 (2): 487-98.                                                     | Irrelevant intervention |
| Dufour J, Ladouceur R, Giroux I. Training program on responsible gambling among video lottery employees. <i>International Gambling Studies</i> , 2010; 10 (1): 61-80.                                                                                            | Irrelevant outcome      |
| Dymond S, McCann K, Griffiths J, Cox A, Crocker V. Emergent response allocation and outcome ratings in slot machine gambling. <i>Psychology of Addictive Behaviors</i> , 2012; 26 (1): 99-111.                                                                   | Irrelevant intervention |
| Ferland F, Ladouceur R, Vitaro F. Prevention of problem gambling: Modifying misconceptions and increasing knowledge. <i>Journal of Gambling Studies</i> , 2002; 18 (1): 19-29.                                                                                   | Other reason            |
| Forsström D, Hesser H, Carlbring P. Usage of a responsible gambling tool: A descriptive analysis and latent class analysis of user behavior. <i>Journal of Gambling Studies</i> , 2016; 32 (3): 889-904.                                                         | Irrelevant outcome      |
| Frahn T, Delfabbro P, King DL. Exposure to Free-Play Modes in Simulated Online Gaming Increases Risk-Taking in Monetary Gambling. <i>J Gambl Stud</i> , 2015; 31 (4): 1531-43.                                                                                   | Irrelevant intervention |
| Fredheim T, Ottersen K-O, Arntzen E. SLOT-MACHINE PREFERENCES AND SELF-RULES. <i>Analysis of Gambling Behavior</i> , 2008; 2 (1): 35-48.                                                                                                                         | Too few participants    |
| Gainsbury S, Aro D, Ball D, Tobar C, Russell A. Determining optimal placement for pop-up messages: Evaluation of a live trial of dynamic warning messages for electronic gaming machines. <i>International Gambling Studies</i> , 2015; 15 (1): 141-58.          | Irrelevant outcome      |
| Gainsbury SM, Abarbanel B, Blaszczyński A. Game on: comparison of demographic profiles, consumption behaviors, and gambling site selection criteria of esports and sports bettors. <i>Gaming law review</i> , 2017; 21 (8): 575-87.                              | Irrelevant intervention |
| Gainsbury SM, Abarbanel B, Blaszczyński A. Intensity and gambling harms: Exploring breadth of gambling involvement among esports bettors. <i>Gaming law review</i> , 2017; 21 (8): 610-15. .                                                                     | Irrelevant intervention |

|                                                                                                                                                                                                                                                                                           |                                |
|-------------------------------------------------------------------------------------------------------------------------------------------------------------------------------------------------------------------------------------------------------------------------------------------|--------------------------------|
| Gainsbury SM, Aro D, Ball D, Tobar C, Russell A. Optimal content for warning messages to enhance consumer decision making and reduce problem gambling. <i>Journal of Business Research</i> , 2015; 68 (10): 2093-101.                                                                     | Irrelevant outcome             |
| Gainsbury SM, Blankers M, Wilkinson C, Schelleman-Offermans K, Cousijn J. Recommendations for international gambling harm-minimisation guidelines: Comparison with effective public health policy. <i>Journal of Gambling Studies</i> , 2014; 30 (4): 771-88.                             | Not a primary study            |
| Gallagher T, Nicki R, Otteson A, Elliott H. Effects of a video lottery terminal (VLT) banner on gambling: A field study. <i>International Journal of Mental Health and Addiction</i> , 2011; 9 (1): 126-33.                                                                               | Too few participants           |
| Gao S, Zika O, Rogers RD, Thierry G. Second language feedback abolishes the "hot hand" effect during even-probability gambling. <i>J Neurosci</i> , 2015; 35 (15): 5983-9.                                                                                                                | Too few participants           |
| Gibson B, Zielaskowski K. Subliminal priming of winning images prompts increased betting in slot machine play. <i>Journal of Applied Social Psychology</i> , 2013; 43 (1): 106-15.                                                                                                        | Irrelevant intervention        |
| Gillis A, McDonald JD, Weatherly JN. AMERICAN INDIANS AND NON-INDIANS PLAYING A SLOT-MACHINE SIMULATION: EFFECT OF SENSATION SEEKING AND PAYBACK PERCENTAGE. <i>American Indian &amp; Alaska Native Mental Health Research: The Journal of the National Center</i> , 2008; 15 (1): 18-32. | Too few participants           |
| Ginley MK, Whelan JP, Pfund RA, Peter SC, Meyers AW. Warning messages for electronic gambling machines: Evidence for regulatory policies. <i>Addiction Research &amp; Theory</i> , 2017; 25 (6): 495-504.                                                                                 | Not a primary study            |
| Giroux I, Boutin C, Ladouceur R, Lachance S, Dufour M. Awareness training program on responsible gambling for casino employees. <i>International Journal of Mental Health and Addiction</i> , 2008; 6 (4): 594-601.                                                                       | Irrelevant outcome             |
| Giroux I, Faucher-Gravel A, St-Hilaire A, Boudreault C, Jacques C, Bouchard S. Gambling exposure in virtual reality and modification of urge to gamble. <i>Cyberpsychol Behav Soc Netw</i> , 2013; 16 (3): 224-31.                                                                        | Too few participants           |
| Giroux I, Ferland F, Savard C, Beaulieu G, LaBoissonnière A-M, Dussault A-M, et al. Évaluation of a website to raise awareness of excessive gambling among among young adults. <i>Journal of Gambling Issues</i> , 2012; 271-21.                                                          | Not in the specified languages |
| Gomes K, Pascual-Leone A. Primed for change: Facilitating factors in problem gambling treatment. <i>Journal of Gambling Studies</i> , 2009; 25 (1): 1-17.                                                                                                                                 | Irrelevant intervention        |
| Graydon C, Dixon MJ, Harrigan KA, Fugelsang JA, Jarick M. Losses disguised as wins in multiline slots: Using an educational animation to reduce erroneous win overestimates. <i>International Gambling Studies</i> , 2017; 17 (3): 442-58.                                                | Irrelevant intervention        |
| Graydon C, Dixon MJ, Stange M, Fugelsang JA. GAMBLING DESPITE FINANCIAL LOSS - THE ROLE OF LOSSES DISGUISED AS WINS IN MULTILINE SLOTS. <i>Addiction</i> , 2018.                                                                                                                          | Duplicate                      |

|                                                                                                                                                                                                                                                                             |                         |
|-----------------------------------------------------------------------------------------------------------------------------------------------------------------------------------------------------------------------------------------------------------------------------|-------------------------|
| Graydon C, Dixon MJ, Stange M, Fugelsang JA. Gambling despite financial loss—the role of losses disguised as wins in multi-line slots. <i>Addiction</i> , 2018.                                                                                                             | Irrelevant intervention |
| Graydon C, Stange M, Dixon MJ. Losses Disguised as Wins Affect Game Selection on Multiline Slots. <i>J Gambl Stud</i> , 2018.                                                                                                                                               | Irrelevant intervention |
| Griffiths MD, Wood RTA, Parke J. Social responsibility tools in online gambling: A survey of attitudes and behavior among Internet gamblers. <i>CyberPsychology &amp; Behavior</i> , 2009; 12 (4): 413-21.                                                                  | Irrelevant intervention |
| Hansen M, Rossow I. Limited cash flow on slot machines: Effects of prohibition of note acceptors on adolescent gambling behaviour. <i>International Journal of Mental Health and Addiction</i> , 2010; 8 (1): 70-81.                                                        | Irrelevant population   |
| Hansen MB, Rossow IM. Does a reduction in the overall amount of gambling imply a reduction at all levels of gambling? <i>Addiction Research &amp; Theory</i> , 2012; 20 (2): 145-52.                                                                                        | Irrelevant intervention |
| Hanss D, Mentzoni RA, Griffiths MD, Pallesen S. The impact of gambling advertising: Problem gamblers report stronger impacts on involvement, knowledge, and awareness than recreational gamblers. <i>Psychol Addict Behav</i> , 2015; 29 (2): 483-91.                       | Irrelevant intervention |
| Hardoon KK, Derevensky JL. Social influences involved in children's gambling behavior. <i>J Gambl Stud</i> , 2001; 17 (3): 191-215.                                                                                                                                         | Irrelevant population   |
| Harrigan KA, Dixon M. Government sanctioned 'tight' and 'loose' slot machines: How having multiple versions of the same slot machine game may impact problem gambling. <i>Journal of Gambling Studies</i> , 2010; 26 (1): 159-74.                                           | Irrelevant intervention |
| Harris A, Griffiths MD. A critical review of the harm-minimisation tools available for electronic gambling. <i>Journal of Gambling Studies</i> , 2017; 33 (1): 187-221.                                                                                                     | Not a primary study     |
| Harris A, Parke A. The interaction of gambling outcome and gambling harm-minimisation strategies for electronic gambling: The efficacy of computer generated self-appraisal messaging. <i>International Journal of Mental Health and Addiction</i> , 2016; 14 (4): 597-617. | Too few participants    |
| Haw J. The relationship between reinforcement and gaming machine choice. <i>J Gambl Stud</i> , 2008; 24 (1): 55-61.                                                                                                                                                         | Irrelevant intervention |
| Hayer T, Meyer G. Internet self-exclusion: Characteristics of self-excluded gamblers and preliminary evidence for its effectiveness. <i>International Journal of Mental Health and Addiction</i> , 2011; 9 (3): 296-307.                                                    | Too few participants    |
| Hayer T, Meyer G. Self-exclusion as a harm minimization strategy: evidence for the casino sector from selected European countries. <i>J Gambl Stud</i> , 2011; 27 (4): 685-700.                                                                                             | Other reason            |
| Hing N, Nuske E. The self-exclusion experience for problem gamblers in South Australia. <i>Australian Social Work</i> , 2012; 65 (4): 457-73.                                                                                                                               | Too few participants    |

|                                                                                                                                                                                                                                                                                |                         |
|--------------------------------------------------------------------------------------------------------------------------------------------------------------------------------------------------------------------------------------------------------------------------------|-------------------------|
| Hing N, Russell A, Tolchard B, Nuske E. Are there distinctive outcomes from self-exclusion? An exploratory study comparing gamblers who have self-excluded, received counselling, or both. <i>International Journal of Mental Health and Addiction</i> , 2015; 13 (4): 481-96. | Too few participants    |
| Hing N, Russell AMT, Lamont M, Vitartas P. Bet Anywhere, Anytime: An Analysis of Internet Sports Bettors' Responses to Gambling Promotions During Sports Broadcasts by Problem Gambling Severity. <i>J Gambl Stud</i> , 2017; 33 (4): 1051-65.                                 | Irrelevant intervention |
| Hing N, Vitartas P, Lamont M. Understanding persuasive attributes of sports betting advertisements: A conjoint analysis of selected elements. <i>J Behav Addict</i> , 2017; 6 (4): 658-68.                                                                                     | Irrelevant intervention |
| Hodgins DC, Currie S, el-Guebaly N, Peden N. Brief motivational treatment for problem gambling: a 24-month follow-up. <i>Psychol Addict Behav</i> , 2004; 18 (3): 293-6.                                                                                                       | Irrelevant intervention |
| Hodgins DC, Currie SR, el-Guebaly N, Diskin KM. Does providing extended relapse prevention bibliotherapy to problem gamblers improve outcome? <i>J Gambl Stud</i> , 2007; 23 (1): 41-54.                                                                                       | Irrelevant intervention |
| Hoon A, Dymond S, Jackson JW, Dixon MR. Contextual control of slot-machine gambling: replication and extension. <i>J Appl Behav Anal</i> , 2008; 41 (3): 467-70.                                                                                                               | Too few participants    |
| Huic A, Kranzelic V, Dodig Hundric D, Ricijas N. Who Really Wins? Efficacy of a Croatian Youth Gambling Prevention Program. <i>J Gambl Stud</i> , 2017; 33 (3): 1011-33.                                                                                                       | Other reason            |
| Jackson AC, Christensen DR, Francis KL, Dowling NA. Consumer perspectives on gambling harm minimisation measures in an Australian jurisdiction. <i>Journal of Gambling Studies</i> , 2016; 32 (2): 801-22.                                                                     | Irrelevant outcome      |
| Jacques C, Ladouceur R, Ferland F. Impact of availability on gambling: a longitudinal study. <i>Can J Psychiatry</i> , 2000; 45 (9): 810-5.                                                                                                                                    | Irrelevant intervention |
| James RJ, O'Malley C, Tunney RJ. Why are Some Games More Addictive than Others: The Effects of Timing and Payoff on Perseverance in a Slot Machine Game. <i>Front Psychol</i> , 2016; 746.                                                                                     | Irrelevant intervention |
| Jolley W, Lee A, Mizerski R, Sadeque S. Permission email messages significantly increase gambler retention. <i>Journal of Business Research</i> , 2013; 66 (9): 1617-22.                                                                                                       | Irrelevant intervention |
| Kairouz S, Fiedler I, Monson E, Arsenault N. Exploring the effects of introducing a state monopoly operator to an unregulated online gambling market. <i>Journal of Gambling Issues</i> , 2017; 37136-48.                                                                      | Irrelevant intervention |
| Kairouz S, Paradis C, Monson E. Gender, gambling settings and gambling behaviours among undergraduate poker players. <i>International Gambling Studies</i> , 2016; 16 (1): 85-97.                                                                                              | Irrelevant intervention |
| Kassinove JI, Schare ML. Effects of the "near miss" and the "big win" on persistence at slot machine gambling. <i>Psychol Addict Behav</i> , 2001; 15 (2): 155-8.                                                                                                              | Irrelevant intervention |
| Keen B, Blaszczyński A, Anjoul F. Systematic Review of Empirically Evaluated School-Based Gambling Education Programs. <i>J Gambl Stud</i> , 2017; 33 (1): 301-25.                                                                                                             | Not a primary study     |

|                                                                                                                                                                                                                                                                                                          |                                |
|----------------------------------------------------------------------------------------------------------------------------------------------------------------------------------------------------------------------------------------------------------------------------------------------------------|--------------------------------|
| Kolandai-Matchett K, Bellringer M, Landon J, Abbott M. A process evaluation of the 'Aware' and 'Supportive Communities' gambling harm-minimisation programmes in New Zealand. <i>Eur J Public Health</i> , 2018; 28 (2): 369-76.                                                                         | Irrelevant intervention        |
| Kolandai-Matchett K, Landon J, Bellringer M, Abbott M. A national public health programme on gambling policy development in New Zealand: insights from a process evaluation. <i>Harm Reduction Journal</i> , 2018; 151-1.                                                                                | Irrelevant intervention        |
| Korn D, Murray M, Morrison M, Reynolds J, Skinner HA. Engaging youth about gambling using the internet: The YouthBet.net website. <i>Can J Public Health</i> , 2006; 97 (6): 448-53.                                                                                                                     | Irrelevant intervention        |
| Kotter R, Kraplin A, Pittig A, Buhringer G. A Systematic Review of Land-Based Self-Exclusion Programs: Demographics, Gambling Behavior, Gambling Problems, Mental Symptoms, and Mental Health. <i>J Gambl Stud</i> , 2018.                                                                               | Not a primary study            |
| Kourgiantakis T, Stark S, Lobo DSS, Tepperman L. Parent problem gambling: A systematic review of prevention programs for children. <i>Journal of Gambling Issues</i> , 2016; 338-29.                                                                                                                     | Not a primary study            |
| Kurucz G, Kormendi A. Can we perceive near miss? An empirical study. <i>J Gambl Stud</i> , 2012; 28 (1): 105-11.                                                                                                                                                                                         | Irrelevant intervention        |
| Kushnir V, Godinho A, Hodgins DC, Hendershot CS, Cunningham JA. Self-Directed Gambling Changes: Trajectory of Problem Gambling Severity in Absence of Treatment. <i>J Gambl Stud</i> , 2018.                                                                                                             | Irrelevant intervention        |
| LaBrie RA, Nelson SE, LaPlante DA, Peller AJ, Caro G, Shaffer HJ. Missouri casino self-excluders: distributions across time and space. <i>J Gambl Stud</i> , 2007; 23 (2): 231-43.                                                                                                                       | Irrelevant outcome             |
| Labrie RA, Peller AJ, Laplante DA, Bernhard B, Harper A, Schrier T, et al. A brief self-help toolkit intervention for gambling problems: a randomized multisite trial. <i>Am J Orthopsychiatry</i> , 2012; 82 (2): 278-89.                                                                               | Irrelevant intervention        |
| Ladouceur R, Boutin C, Doucet C, Dumont M, Provencher M, Giroux I, et al. Awareness promotion about excessive gambling among video lottery retailers. <i>J Gambl Stud</i> , 2004; 20 (2): 181-5.                                                                                                         | Irrelevant outcome             |
| Ladouceur R, Ferland F, Roy C, Pelletier O, Bussi res EL, Auclair A. Pr vention du jeu excessif chez les adolescents: Une approche cognitive = Prevention of pathological gambling in adolescents: A cognitive approach. <i>Journal de Th rapie Comportementale et Cognitive</i> , 2004; 14 (3): 124-30. | Too few participants           |
| Ladouceur R, Ferland F, Vitaro F. Prevention of Problem Gambling: Modifying Misconceptions and Increasing Knowledge Among Canadian Youths. <i>The Journal of Primary Prevention</i> , 2004; 25 (3): 329-35.                                                                                              | Not in the specified languages |
| Ladouceur R, Jacques C, Giroux I, Ferland F, Leblond J. Analysis of a casino's self-exclusion program. <i>Journal of Gambling Studies</i> , 2000; 16 (4): 453-60.                                                                                                                                        | Other reason                   |
| Ladouceur R, Sevigny S, Blaszczyński A, O'Connor K, Lavoie ME. Video lottery: winning expectancies and arousal. <i>Addiction</i> , 2003; 98 (6): 733-8.                                                                                                                                                  | Irrelevant study design        |

|                                                                                                                                                                                                                                                                    |                         |
|--------------------------------------------------------------------------------------------------------------------------------------------------------------------------------------------------------------------------------------------------------------------|-------------------------|
| Ladouceur R, Sévigny S. Electronic gambling machines: Influence of a clock, a cash display, and a precommitment on gambling time. <i>Journal of Gambling Issues</i> , 2009; 2331-41.                                                                               | Irrelevant population   |
| Ladouceur R, Sevigny S. Interactive Messages on Video Lottery Terminals and Persistence in Gambling. <i>Gambling Research</i> : 2003; 15 (1, May 2003): 45-50. <i>Journal of the National Association for Gambling Studies (Australia)</i>                         | Irrelevant intervention |
| Ladouceur R, Sévigny S. Structural Characteristics of Video Lotteries: Effects of a Stopping Device on Illusion of Control and Gambling Persistence. <i>Journal of Gambling Studies</i> , 2005; 21 (2): 117-31.                                                    | Too few participants    |
| Ladouceur R, Sevigny S. Symbols presentation modality as a determinant of gambling behavior. <i>J Psychol</i> , 2002; 136 (4): 443-8.                                                                                                                              | Too few participants    |
| Ladouceur R, Sévigny S. The impact of video lottery game speed on gamblers. <i>Journal of Gambling Issues</i> , 2006; 17.                                                                                                                                          | Irrelevant intervention |
| Ladouceur R, Shaffer P, Blaszczynski A, Shaffer HJ. Responsible gambling: A synthesis of the empirical evidence. <i>Addiction Research &amp; Theory</i> , 2017; 25 (3): 225-35.                                                                                    | Not a primary study     |
| Lalande D, Ladouceur R. Can cybernetics inspire gambling research? A limit-based conceptualization of self-control. <i>International Gambling Studies</i> , 2011; 11 (2): 237-52.                                                                                  | Too few participants    |
| Lambos C, Delfabbro P. Numerical reasoning ability and irrational beliefs in problem gambling. <i>International Gambling Studies</i> , 2007; 7 (2): 157-71.                                                                                                        | Irrelevant population   |
| Landon J, du Preez KP, Bellringer M, Abbott M, Roberts A. On the feasibility of in-venue observations of electronic gaming machine gamblers and game characteristics. <i>Journal of Gambling Issues</i> , 2017; 36:183-98.                                         | Irrelevant intervention |
| Landon J, du Preez KP, Bellringer M, Page A, Abbott M. Pop-up messages on electronic gaming machines in New Zealand: Experiences and views of gamblers and venue staff. <i>International Gambling Studies</i> , 2016; 16 (1): 49-66.                               | Not a primary study     |
| LaPlante DA, Gray HM, LaBrie RA, Kleschinsky JH, Shaffer HJ. Gaming industry employees' responses to responsible gambling training: a public health imperative. <i>J Gambl Stud</i> , 2012; 28 (2): 171-91.                                                        | Irrelevant outcome      |
| Larimer ME, Neighbors C, Lostutter TW, Whiteside U, Crounce JM, Kaysen D, et al. Brief motivational feedback and cognitive behavioral interventions for prevention of disordered gambling: a randomized clinical trial. <i>Addiction</i> , 2012; 107 (6): 1148-58. | Irrelevant intervention |
| Lavoie MP, Ladouceur R. Prevention of gambling among youth: Increasing knowledge and modifying attitudes toward gambling. <i>Journal of Gambling Issues</i> , 2004.                                                                                                | Irrelevant population   |
| Leino T, Torsheim T, Pallesen S, Blaszczynski A, Sagoe D, Molde H. An empirical real-world study of losses disguised as wins in electronic gaming machines. <i>International Gambling Studies</i> , 2016; 16 (3): 470-80.                                          | Irrelevant intervention |

Lemoine JE, Roland-Lévy C. The effect of the presence of an audience on risk-taking while gambling: The social shield. *Social Influence*, 2017; 12 (2): 101-14. Irrelevant intervention

Li E, Rockloff MJ, Browne M, Donaldson P. Jackpot Structural Features: Rollover Effect and Goal-Gradient Effect in EGM Gambling. *J Gambl Stud*, 2016; 32 (2): 707-20. Too few participants

Loba P, Stewart SH, Klein RM, Blackburn JR. Manipulations of the features of standard video lottery terminal (VLT) games: Effects in pathological and non-pathological gamblers. *Journal of Gambling Studies*, 2001; 17 (4): 297-320. Irrelevant intervention

Losecaat Vermeer AB, Sanfey AG. The Effect of Positive and Negative Feedback on Risk-Taking across Different Contexts. *PLoS One*, 2015; 10 (9): e0139010. Irrelevant intervention

Ludwig M, Kraus L, Müller S, Braun B, Bühringer G. Has gambling changed after major amendments of gambling regulations in Germany? A propensity score analysis. *Journal of Behavioral Addictions*, 2012; 1 (4): 151-61. Irrelevant intervention

Not a primary study

Luk AL, Au AM, Leong KM, Zhu MM, Lau GB, Wong TC, et al. Effectiveness of a positive youth development program for secondary 1 students in Macau: a pilot study. *ScientificWorldJournal*, 2011; 111089-100.

Luk AL, Chan WU, Hu SX. Macau, world capital for gambling: a longitudinal study of a youth program designed to instill positive values. *Front Public Health*, 2013; 158. Not a primary study

Lund I. Gambling behaviour and the prevalence of gambling problems in adult EGM gamblers when EGMs are banned A natural experiment. *Journal of Gambling Studies*, 2009; 25 (2): 215-25. Irrelevant intervention

Luquiens A, Tanguy ML, Lagadec M, Benyamina A, Aubin HJ, Reynaud M. The Efficacy of Three Modalities of Internet-Based Psychotherapy for Non-Treatment-Seeking Online Problem Gamblers: A Randomized Controlled Trial. *J Med Internet Res*, 2016; 18 (2): e36. Irrelevant intervention

MacLin OH, Dixon MR, Daugherty D, Small SL. Using a computer simulation of three slot machines to investigate a gambler's preference among varying densities of near-miss alternatives. *Behav Res Methods*, 2007; 39 (2): 237-41. Irrelevant intervention

Marionneau V, Järvinen-Tassopoulos J. Consumer protection in licensed online gambling markets in France: The role of responsible gambling tools. *Addiction Research & Theory*, 2017; 25 (6): 436-43. Irrelevant intervention

Markham F, Young M, Doran B. Gambling expenditure predicts harm: Evidence from a venue-level study. *Addiction*, 2014; 109 (9): 1509-16. Irrelevant intervention

Martinez F, Le Floch V, Gaffie B, Villejoubert G. Reports of wins and risk taking: an investigation of the mediating effect of the illusion of control. *J Gambl Stud*, 2011; 27 (2): 271-85. Irrelevant intervention

|                                                                                                                                                                                                                                                      |                                |
|------------------------------------------------------------------------------------------------------------------------------------------------------------------------------------------------------------------------------------------------------|--------------------------------|
| McDougall CL, Terrance C, Weatherly JN. The effect of male confederate presence, betting, and accuracy of play on males' gambling on blackjack. <i>The Psychological Record</i> , 2011; 61 (3): 411-24.                                              | Irrelevant intervention        |
| McKinley CJ, Wright PJ. Examining the presence of problem gambling awareness messages on college counseling center websites. <i>Health Commun</i> , 2012; 27 (1): 98-106.                                                                            | Irrelevant intervention        |
| Mentzoni RA, Laberg JC, Brunborg GS, Molde H, Pallesen S. Type of musical soundtrack affects behavior in gambling. <i>Journal of Behavioral Addictions</i> , 2014; 3 (2): 102-06.                                                                    | Irrelevant intervention        |
| Mentzoni RA, Laberg JC, Brunborg GS, Molde H, Stale P. Type of musical soundtrack affects behavior in gambling. <i>J Behav Addict</i> , 2014; 3 (2): 102-6.                                                                                          | Irrelevant intervention        |
| Meyer G, von Meduna M, Brosowski T. Spieler- und jugendschutz in spielhallen: Ein praxistest = Gambler and youth protection in amusement arcades: Practical experiences. <i>Sucht: Zeitschrift für Wissenschaft und Praxis</i> , 2015; 61 (1): 9-18. | Not in the specified languages |
| Molde H, Mentzoni R, Hanss D, Sagoe D, Andersen SL, Pallesen S. People around you—Do they matter? An experimental gambling study. <i>International Gambling Studies</i> , 2017; 17 (3): 349-65.                                                      | Irrelevant intervention        |
| Monaghan S, Blaszczyński A, Nower L. Do warning signs on electronic gaming machines influence irrational cognitions? <i>Psychol Rep</i> , 2009; 105 (1): 173-87.                                                                                     | Not a primary study            |
| Monaghan S, Blaszczyński A. Electronic gaming machine warning messages: Information versus self-evaluation. <i>The Journal of Psychology: Interdisciplinary and Applied</i> , 2009; 144 (1): 83-96.                                                  | Irrelevant outcome             |
| Monaghan S, Blaszczyński A. Impact of mode of display and message content of responsible gambling signs for electronic gaming machines on regular gamblers. <i>J Gambl Stud</i> , 2010; 26 (1): 67-88.                                               | Irrelevant outcome             |
| Monaghan S, Blaszczyński A. Recall of electronic gaming machine signs: A static versus a dynamic mode of presentation. <i>Journal of Gambling Issues</i> , 2007; 20253-68.                                                                           | Not a primary study            |
| Monaghan S. Responsible gambling strategies for internet gambling: The theoretical and empirical base of using pop-up messages to encourage self-awareness. <i>Computers in Human Behavior</i> , 2009; 25 (1): 202-07.                               | Irrelevant outcome             |
| Moodie C, Reith G. Responsible gambling signage on electronic gaming machines, before and after the implementation of the United Kingdom Gambling Act: An observational study. <i>International Gambling Studies</i> , 2009; 9 (1): 5-17.            | Irrelevant outcome             |
| Moore SM, Thomas AC, Kyrios M, Bates G. The self-regulation of gambling. <i>J Gambl Stud</i> , 2012; 28 (3): 405-20.                                                                                                                                 | Irrelevant outcome             |
| Mouneyrac A, Le Floch V, Lemerrier C, Py J, Roumegue M. Promoting responsible gambling via prevention messages: Insights from the evaluation of actual European messages. <i>International Gambling Studies</i> , 2017; 17 (3): 426-41.              | Irrelevant intervention        |
| Munoz Y, Chebat JC, Borges A. Graphic gambling warnings: how they affect emotions, cognitive responses and attitude change. <i>J Gambl Stud</i> , 2013; 29 (3): 507-24.                                                                              | Irrelevant outcome             |

|                                                                                                                                                                                                                                                                   |                         |
|-------------------------------------------------------------------------------------------------------------------------------------------------------------------------------------------------------------------------------------------------------------------|-------------------------|
| Munoz Y, Chebat JC, Suissa JA. Using fear appeals in warning labels to promote responsible gambling among VLT players: the key role of depth of information processing. <i>J Gambl Stud</i> , 2010; 26 (4): 593-609.                                              | Irrelevant outcome      |
| Najavits LM, Grymala LD, George B. Can advertising increase awareness of problem gambling? A statewide survey of impact. <i>Psychol Addict Behav</i> , 2003; 17 (4): 324-7.                                                                                       | Irrelevant intervention |
| Nastally BL, Dixon MR, Jackson JW. Manipulating slot machine preference in problem gamblers through contextual control. <i>J Appl Behav Anal</i> , 2010; 43 (1): 125-9.                                                                                           | Too few participants    |
| Nehlin C, Nyberg F, Jess K. Brief Intervention Within Primary Care for At-Risk Gambling: A Pilot Study. <i>J Gambl Stud</i> , 2016; 32 (4): 1327-35.                                                                                                              | Too few participants    |
| Nisbet S, Jackson A, Christensen D. The Influence of Pre-Commitment and Associated Player-Card Technologies on Decision Making: Design, Research and Implementation Issues. <i>International Journal of Mental Health &amp; Addiction</i> , 2016; 14 (3): 228-40. | Irrelevant outcome      |
| Nisbet S. Responsible Gambling Features of Card-Based Technologies. <i>eCOMMUNITY: International Journal of Mental Health &amp; Addiction</i> , 2005; 3 (2): 54-63.                                                                                               | Irrelevant study design |
| Nixon G, Leigh G, Nowatzki N. Impacting attitudes towards gambling: A prison gambling awareness and prevention program. <i>Journal of Gambling Issues</i> , 2006; 17.                                                                                             | Not a primary study     |
| Nordmyr J, Forsman AK. A systematic mapping of nordic gambling research 2000-2015: current status and suggested future directions. <i>Addiction Research &amp; Theory</i> , 2018; 26 (5): 339-48.                                                                 | Not a primary study     |
| Noseworthy TJ, Finlay K. A comparison of ambient casino sound and music: effects on dissociation and on perceptions of elapsed time while playing slot machines. <i>J Gambl Stud</i> , 2009; 25 (3): 331-42.                                                      | Irrelevant intervention |
| Noussair C, Wu P. Risk Tolerance in the Present and the Future: An Experimental Study. <i>Managerial &amp; Decision Economics</i> , 2006; 27 (6): 401-12.                                                                                                         | Irrelevant intervention |
| Nower L, Blaszczynski A. Gambling motivations, money-limiting strategies, and precommitment preferences of problem versus non-problem gamblers. <i>J Gambl Stud</i> , 2010; 26 (3): 361-72.                                                                       | Irrelevant intervention |
| Nower L, Blaszczynski A. The Pathways Model as Harm Minimization for Youth Gamblers in Educational Settings. <i>Child &amp; Adolescent Social Work Journal</i> , 2004; 21 (1): 25-45.                                                                             | Not a primary study     |
| Oehler S, Banzer R, Gruenerbl A, Malischnig D, Griffiths MD, Haring C. Principles for Developing Benchmark Criteria for Staff Training in Responsible Gambling. <i>J Gambl Stud</i> , 2017; 33 (1): 167-86.                                                       | Irrelevant intervention |
| Oh BC, Ong YJ, Loo JMY. A review of educational-based gambling prevention programs for adolescents. <i>Asian J Gambl Issues Public Health</i> , 2017; 7 (1): 4.                                                                                                   | Not a primary study     |

|                                                                                                                                                                                                                                                                          |                         |
|--------------------------------------------------------------------------------------------------------------------------------------------------------------------------------------------------------------------------------------------------------------------------|-------------------------|
| Palmer du Preez K, Landon J, Bellringer M, Garrett N, Abbott M. The effects of pop-up harm minimisation messages on electronic gaming machine gambling behaviour in New Zealand. <i>Journal of Gambling Studies</i> , 2016; 32 (4): 1115-26.                             | Irrelevant outcome      |
| Parham BR, Robertson C, Lever N, Hoover S, Palmer T, Lee P, et al. Enhancing the Relevance and Effectiveness of a Youth Gambling Prevention Program for Urban, Minority Youth: A Pilot Study of Maryland Smart Choices. <i>J Gambl Stud</i> , 2018.                      | Not a primary study     |
| Parhami I, Davtian M, Hanna K, Calix I, Fong TW. The implementation of a telephone-delivered intervention for Asian American disordered gamblers: A pilot study. <i>Asian American Journal of Psychology</i> , 2012; 3 (3): 145-59.                                      | Irrelevant intervention |
| Park CB, Park SM, Gwak AR, Sohn BK, Lee JY, Jung HY, et al. The effect of repeated exposure to virtual gambling cues on the urge to gamble. <i>Addict Behav</i> , 2015; 4161-4.                                                                                          | Too few participants    |
| Park C-B, Park SM, Gwak AR, Sohn BK, Lee J-Y, Jung HY, et al. The effect of repeated exposure to virtual gambling cues on the urge to gamble. <i>Addictive Behaviors</i> , 2015; 4161-64.                                                                                | Too few participants    |
| Petry NM, Rash CJ, Alessi SM. A randomized controlled trial of brief interventions for problem gambling in substance abuse treatment patients. <i>J Consult Clin Psychol</i> , 2016; 84 (10): 874-86.                                                                    | Too few participants    |
| Petry NM, Weinstock J, Ledgerwood DM, Morasco B. A randomized trial of brief interventions for problem and pathological gamblers. <i>J Consult Clin Psychol</i> , 2008; 76 (2): 318-28.                                                                                  | Irrelevant intervention |
| Petry NM, Weinstock J, Morasco BJ, Ledgerwood DM. Brief motivational interventions for college student problem gamblers. <i>Addiction</i> , 2009; 104 (9): 1569-78.                                                                                                      | Irrelevant intervention |
| Petry NM. Pathological gamblers, with and without substance use disorders, discount delayed rewards at high rates. <i>J Abnorm Psychol</i> , 2001; 110 (3): 482-7.                                                                                                       | Irrelevant intervention |
| Phillips JG, Landon J. Dynamic changes in the use of online advice in response to task success or failure. <i>Behaviour &amp; Information Technology</i> , 2016; 35 (10): 796-806.                                                                                       | Too few participants    |
| Pickering D, Blaszczyński A, Gainsbury SM. Multi-Venue Self-Exclusion for Gambling Disorders: A Retrospective Process Investigation. <i>Journal of Gambling Issues</i> , 2018; (38): 127-51.                                                                             | Too few participants    |
| Rafi J, Ivanova E, Rozental A, Carlbring P. Effects of a workplace prevention programme for problem gambling: study protocol for a cluster randomised controlled trial. <i>BMJ Open</i> , 2017; 7 (9): e015963.                                                          | Not a primary study     |
| Raisamo S, Warpenius K, Rimpelä A. Changes in minors' gambling on slot machines in Finland after the raising of the minimum legal gambling age from 15 to 18 years: A repeated cross-sectional study. <i>Nordic Studies on Alcohol and Drugs</i> , 2015; 32 (6): 579-90. | Irrelevant intervention |
| Ranta J, Bellringer M, Garrett N, Abbott M. Can a Brief Telephone Intervention for Problem Gambling Help to Reduce Co-existing Depression? A Three-Year Prospective Study in New Zealand. <i>J Gambl Stud</i> , 2018.                                                    | Irrelevant intervention |

|                                                                                                                                                                                                                                                     |                         |
|-----------------------------------------------------------------------------------------------------------------------------------------------------------------------------------------------------------------------------------------------------|-------------------------|
| Riley BJ. The role of homework in exposure-based CBT outcome for problem gambling. <i>International Gambling Studies</i> , 2015; 15 (3): 394-407.                                                                                                   | Irrelevant intervention |
| Rintoul A, Deblaquiere J, Thomas A. Responsible gambling codes of conduct: Lack of harm minimisation intervention in the context of venue self-regulation. <i>Addiction Research &amp; Theory</i> , 2017; 25 (6): 451-61.                           | Irrelevant outcome      |
| Riva P, Sacchi S, Brambilla M. Humanizing machines: Anthropomorphization of slot machines increases gambling. <i>Journal of Experimental Psychology: Applied</i> , 2015; 21 (4): 313-25.                                                            | Irrelevant intervention |
| Robitaille E, Herjean P. An analysis of the accessibility of video lottery terminals: the case of Montreal. <i>Int J Health Geogr</i> , 2008; 72.                                                                                                   | Irrelevant intervention |
| Rockloff MJ, Dyer V. An experiment on the social facilitation of gambling behavior. <i>J Gambl Stud</i> , 2007; 23 (1): 1-12.                                                                                                                       | Irrelevant intervention |
| Rockloff MJ, Greer N, Evans LG. The effect of mere presence on electronic gaming machine gambling. <i>Journal of Gambling Issues</i> , 2012; 271-14.                                                                                                | Irrelevant intervention |
| Rockloff MJ, Greer N, Fay C. The social contagion of gambling: how venue size contributes to player losses. <i>J Gambl Stud</i> , 2011; 27 (3): 487-97.                                                                                             | Irrelevant intervention |
| Rockloff MJ, Greer N. Audience influence on EGM gambling: The protective effects of having others watch you play. <i>Journal of Gambling Studies</i> , 2011; 27 (3): 443-51.                                                                        | Irrelevant intervention |
| Rockloff MJ, Greer N. Never smile at a crocodile: betting on electronic gaming machines is intensified by reptile-induced arousal. <i>J Gambl Stud</i> , 2010; 26 (4): 571-81.                                                                      | Irrelevant intervention |
| Rockloff MJ, Signal T, Dyer V. Full of sound and fury, signifying something: the impact of autonomic arousal on EGM gambling. <i>J Gambl Stud</i> , 2007; 23 (4): 457-65.                                                                           | Irrelevant intervention |
| Rodda SN, Hing N, Hodgins DC, Cheetham A, Dickins M, Lubman DI. Change strategies and associated implementation challenges: An analysis of online counselling sessions. <i>Journal of Gambling Studies</i> , 2017; 33 (3): 955-73.                  | Irrelevant study design |
| Rodda SN, Hing N, Lubman DI. Improved outcomes following contact with a gambling helpline: The impact of gender on barriers and facilitators. <i>International Gambling Studies</i> , 2014; 14 (2): 318-29.                                         | Too few participants    |
| Rossow I, Hansen MB, Storvoll EE. Changes in youth gambling after the removal of slot machines in Norway. <i>Nordic Studies on Alcohol and Drugs</i> , 2013; 30 (4): 317-30.                                                                        | Irrelevant study design |
| Rossow I, Hansen MB. Gambling and gambling policy in Norway—An exceptional case. <i>Addiction</i> , 2016; 111 (4): 593-98.                                                                                                                          | Irrelevant intervention |
| Sagoe D, Eide TA, Øhrn H, Leino T, Mentzoni RA, Pallesen S. Negative wins do not reinforce 'short-term' slot machine gambling intensity, game evaluation, and gambling beliefs. <i>International Journal of Mental Health and Addiction</i> , 2017. | Irrelevant intervention |

|                                                                                                                                                                                                                                                               |                         |
|---------------------------------------------------------------------------------------------------------------------------------------------------------------------------------------------------------------------------------------------------------------|-------------------------|
| Sevigny S, Ladouceur R, Jacques C, Cantinotti M. Links between casino proximity and gambling participation, expenditure, and pathology. <i>Psychol Addict Behav</i> , 2008; 22 (2): 295-301.                                                                  | Irrelevant intervention |
| Sharman S, Aitken MRF, Clark L. Dual effects of 'losses disguised as wins' and near-misses in a slot machine game. <i>International Gambling Studies</i> , 2015; 15 (2): 212-23.                                                                              | Irrelevant intervention |
| Shead NW, Walsh K, Taylor A, Derevensky JL, Gupta R. Youth gambling prevention: Can public service announcements featuring celebrity spokespersons be effective? <i>International Journal of Mental Health and Addiction</i> , 2011; 9 (2): 165-79.           | Irrelevant intervention |
| Shek DT, Lee JJ. Prevention of problem gambling in Chinese adolescents: relevance of problem gambling assessment and positive youth development frameworks. <i>Int J Adolesc Med Health</i> , 2010; 22 (1): 139-51.                                           | Not a primary study     |
| Shek DT, Yu L, Leung H, Wu FK, Law MY. Development, implementation, and evaluation of a multi-addiction prevention program for primary school students in Hong Kong: the B.E.S.T. Teen Program. . <i>Asian J Gambl Issues Public Health</i> , 2016; 6 (1): 5. | Irrelevant population   |
| Siemens JC, Kopp SW. The influence of online gambling environments on self-control. <i>Journal of Public Policy &amp; Marketing</i> , 2011; 30 (2): 279-93.                                                                                                   | Irrelevant intervention |
| Siller H-S, Maaß J. Learning mathematics or losing money—betting as a topic for mathematical education. <i>Teaching Mathematics &amp; its Applications</i> , 2012; 31 (2): 65-83.                                                                             | Irrelevant study design |
| Spenwyn J, Barrett DJK, Griffiths MD. The role of light and music in gambling behaviour: An empirical pilot study. <i>International Journal of Mental Health and Addiction</i> , 2010; 8 (1): 107-18.                                                         | Irrelevant intervention |
| Stange M, Brown DG, Harrigan K, Dixon M. Built-in bad luck: Evidence of near-miss outcomes by design in scratch cards. <i>Journal of Gambling Issues</i> , 2017; 3651-64.                                                                                     | Irrelevant intervention |
| Stange M, Grau M, Osazuwa S, Graydon C, Dixon MJ. Reinforcing small wins and frustrating near-misses: Further investigation into scratch card gambling. <i>Journal of Gambling Studies</i> , 2017; 33 (1): 47-63.                                             | Irrelevant intervention |
| Stewart MJ, Yi S, Stewart SH. Effects of gambling-related cues on the activation of implicit and explicit gambling outcome expectancies in regular gamblers. <i>J Gambl Stud</i> , 2014; 30 (3): 653-68.                                                      | Irrelevant intervention |
| Stevens T, Brevers D, Chambers CD, Lavric A, McLaren IP, Mertens M, et al. How does response inhibition influence decision making when gambling? <i>J Exp Psychol Appl</i> , 2015; 21 (1): 15-36.                                                             | Irrelevant intervention |
| St-Pierre RA, Temcheff CE, Derevensky JL, Gupta R. Theory of Planned Behavior in School-Based Adolescent Problem Gambling Prevention: A Conceptual Framework. <i>J Prim Prev</i> , 2015; 36 (6): 361-85.                                                      | Not a primary study     |
| Strohaker T, Becker T. The Relationship Between Exclusions from Gambling Arcades and Accessibility: Evidence from a Newly Introduced Exclusion Program in Hesse, Germany. <i>J Gambl Stud</i> , 2018; 34 (3): 1033-47.                                        | Irrelevant intervention |

|                                                                                                                                                                                                                             |                         |
|-----------------------------------------------------------------------------------------------------------------------------------------------------------------------------------------------------------------------------|-------------------------|
| Suh E. Estimating the impact of free-play coupon value on players' slot gaming volumes. <i>Cornell Hospitality Quarterly</i> , 2012; 53 (2): 134-43.                                                                        | Irrelevant intervention |
| Tanner J, Dawson AS, Mushquash CJ, Mushquash AR, Mazmanian D. Harm reduction in gambling: A systematic review of industry strategies. <i>Addiction Research &amp; Theory</i> , 2017; 25 (6): 485-94.                        | Not a primary study     |
| Taylor LM, Hillyard P. Gambling awareness for youth: An analysis of the 'Don't Gamble Away our FutureTM' program. <i>International Journal of Mental Health and Addiction</i> , 2009; 7 (1): 250-61.                        | Irrelevant study design |
| Thompson SJ, Corr PJ. A feedback-response pause normalises response perseveration deficits in pathological gamblers. <i>International Journal of Mental Health and Addiction</i> , 2013; 11 (5): 601-10.                    | Irrelevant population   |
| Tingchi Liu M, Wong IA, Rongwei C, Tseng T-H. Do perceived CSR initiatives enhance customer preference and loyalty in casinos? <i>International Journal of Contemporary Hospitality Management</i> , 2014; 26 (7): 1024-45. | Irrelevant intervention |
| Todirita IR, Lupu V. Gambling prevention program among children. <i>J Gambl Stud</i> , 2013; 29 (1): 161-9.                                                                                                                 | Irrelevant population   |
| Toneatto T. Single-session interventions for problem gambling may be as effective as longer treatments: Results of a randomized control trial. <i>Addict Behav</i> , 2016; 5258-65.                                         | Irrelevant intervention |
| Townshend P. Self-exclusion in a public health environment: An effective treatment option in New Zealand. <i>International Journal of Mental Health and Addiction</i> , 2007; 5 (4): 390-95.                                | Too few participants    |
| Tremblay N, Boutin C, Ladouceur R. Improved self-exclusion program: preliminary results. <i>J Gambl Stud</i> , 2008; 24 (4): 505-18.                                                                                        | Too few participants    |
| Turner NE, Robinson J, Harrigan K, Ferentzy P, Jindani F. A Pilot Evaluation of a Tutorial to Teach Clients and Clinicians About Gambling Game Design. <i>Int J Ment Health Addict</i> , 2018; 16 (1): 136-49.              | Too few participants    |
| Walker DM, Litvin SW, Sobel RS, St-Pierre RA. Setting win limits: An alternative approach to 'responsible gambling'? <i>Journal of Gambling Studies</i> , 2015; 31 (3): 965-86.                                             | Not a primary study     |
| Walther B, Hanewinkel R, Morgenstern M. Short-term effects of a school-based program on gambling prevention in adolescents. <i>J Adolesc Health</i> , 2013; 52 (5): 599-605.                                                | Irrelevant population   |
| Weatherly JN, Brandt AE. Participants's sensitivity to percentage payback and credit value when playing a slot-machine simulation. <i>Behavior and Social Issues</i> , 2004; 13 (1): 33-50.                                 | Irrelevant intervention |
| Weatherly JN, McDougall CL, Gillis AA. A bird in hand: discouraging gambling on a slot machine simulation. <i>J Psychol</i> , 2006; 140 (4): 347-61.                                                                        | Irrelevant intervention |
| Weatherly JN, Sauter JM, King BM. The "big win" and resistance to extinction when gambling. <i>J Psychol</i> , 2004; 138 (6): 495-504.                                                                                      | Irrelevant intervention |
| Verbruggen F, Adams RC, van 't Wout F, Stevens T, McLaren IPL, Chambers CD. Are the Effects of Response Inhibition on Gambling Long-Lasting? <i>PLoS ONE</i> , 2013; 8 (7): 1-7.                                            | Irrelevant outcome      |

|                                                                                                                                                                                                                                                                                           |                         |
|-------------------------------------------------------------------------------------------------------------------------------------------------------------------------------------------------------------------------------------------------------------------------------------------|-------------------------|
| Whiting SW, Dixon MR. Effects of mental imagery on gambling behavior. <i>J Gambl Stud</i> , 2013; 29 (3): 525-34.                                                                                                                                                                         | Irrelevant intervention |
| Whitton M, Weatherly JN. The effect of near-miss rate and card control when American Indians and non-indians gamble in a laboratory situation: the influence of alcohol. <i>Am Indian Alsk Native Ment Health Res</i> , 2009; 16 (2): 28-42.                                              | Irrelevant intervention |
| Wilson AN, Grant T. Implications of Derived Rule Following of Roulette Gambling for Clinical Practice. <i>Behav Anal Pract</i> , 2015; 8 (1): 52-56.                                                                                                                                      | Irrelevant intervention |
| Wohl MJ, Gainsbury S, Stewart MJ, Sztainert T. Facilitating responsible gambling: the relative effectiveness of education-based animation and monetary limit setting pop-up messages among electronic gaming machine players. <i>J Gambl Stud</i> , 2013; 29 (4): 703-17.                 | Too few participants    |
| Wohl MJA, Davis CG, Hollingshead SJ. How much have you won or lost? Personalized behavioral feedback about gambling expenditures regulates play. <i>Computers in Human Behavior</i> , 2017; 70437-45.                                                                                     | Irrelevant intervention |
| Wohl MJA, Enzle ME. The effects of near wins and near losses on self-perceived personal luck and subsequent gambling behavior. <i>Journal of Experimental Social Psychology</i> , 2003; 39 (2): 184-91.                                                                                   | Irrelevant intervention |
| Wohl MJA, Santesso DL, Harrigan K. Reducing erroneous cognition and the frequency of exceeding limits among slots players: A short (3-minute) educational animation facilitates responsible gambling. <i>International Journal of Mental Health and Addiction</i> , 2013; 11 (4): 409-23. | Irrelevant outcome      |
| Wood RTA, Wood SA. An evaluation of two United Kingdom online support forums designed to help people with gambling issues. <i>Journal of Gambling Issues</i> , 2009; 235-30.                                                                                                              | Irrelevant outcome      |
| Wu Y, Dijk E, Li H, Aitken M, Clark L. On the counterfactual nature of gambling near-misses: An experimental study. <i>Journal of Behavioral Decision Making</i> , 2017; 30 (4): 855-68.                                                                                                  | Irrelevant intervention |
| Xuan Z, Shaffer H. How do gamblers end gambling: longitudinal analysis of Internet gambling behaviors prior to account closure due to gambling related problems. <i>J Gambl Stud</i> , 2009; 25 (2): 239-52.                                                                              | Irrelevant intervention |
| Young M, Markham F, Doran B. Too close to home? The relationships between residential distance to venue and gambling outcomes. <i>International Gambling Studies</i> , 2012; 12 (2): 257-73.                                                                                              | Irrelevant intervention |
| Young MM, Wohl MJ, Matheson K, Baumann S, Anisman H. The desire to gamble: the influence of outcomes on the priming effects of a gambling episode. <i>J Gambl Stud</i> , 2008; 24 (3): 275-93.                                                                                            | Irrelevant intervention |
| Yücel M, Carter A, Harrigan K, van Holst RJ, Livingstone C. Hooked on gambling: A problem of human or machine design? <i>The Lancet Psychiatry</i> , 2018; 5 (1): 20-21.                                                                                                                  | Not a primary study     |
| Zhang MW, Yi Y, Cheok CC. Internet based personalized feedback interventions for gamblers in Singapore: First results. <i>Technol Health Care</i> , 2016; 24 (2): 177-83.                                                                                                                 | Irrelevant intervention |

Zlomke KR, Dixon MR. Modification of slot-machine preferences through the use of a conditional discrimination paradigm. *J Appl Behav Anal*, 2006; 39 (3): 351-61. Too few participants
