# Supplementary material
Source: publisher figshare collection journal article supplement (https://tandf.figshare.com/articles/dataset/_/11952384)
Supplement: Supplementary file 1 [file 1 › iart_a_1729753_sm4058.xlsx]

## Sheet: cohort
				Confounding		Selection					Missing data			Selective reporting				Analysis
rec no	Reference	Title	Year	1.1 Is there potential for important confounding of the effect of intervention?	Risk of bias	2.1 Was the target population selected in an appropriate way?	2.2 Did the population in the pre- and post-evaluation consist of the same participants?	2.3 Was the baseline and follow-up made on individual level?	If N/PN/NI for 2.2 and 2.3: does it influence the effect the intervention	Risk of bias	3.1 Were outcome data available for all, or nearly all, participants?	3.2 if N/PN: used a relevant method for handling missing data (användes lämplig metod för att hantera missing data)?	Risk of bias	4.1. Are the reported outcome data likely to have been selected, on the basis of the results, from multiple measurements (e.g. scales, definitions, time points)?	4.2 Are the reported outcome data likely to have been selected from multiple analyses of the data?	4.3 Are the reported outcome data likely to have been selected, on the basis of the results, from different subgroups?	Risk of bias	5.1 Relevant method used to calculate the results (användes lämplig metod för att beräkna resultatet)?	Risk of bias	Confounding bias	Selection bias	Missing data bias	Selective reporting bias	Analysis bias	Summary overall risk of bias	Comments (Comment if different different outcomes from the same study differ in risk of bias).

## Sheet: SUMMARY
REC NO	FÖRFATTARE	CONFOUNDING	MISSING DATA	SELECTIVE	ANALYSIS	OVERALL BIAS
0	0	0	0	0	0	0
0	0	0	0	0	0	0
0	0	0	0	0	0	0
#REF!	#REF!	#REF!	#REF!	#REF!	#REF!	#REF!
#REF!	#REF!	#REF!	#REF!	#REF!	#REF!	#REF!
#REF!	#REF!	#REF!	#REF!	#REF!	#REF!	#REF!
#REF!	#REF!	#REF!	#REF!	#REF!	#REF!	#REF!
#REF!	#REF!	#REF!	#REF!	#REF!	#REF!	#REF!
#REF!	#REF!	#REF!	#REF!	#REF!	#REF!	#REF!
#REF!	#REF!	#REF!	#REF!	#REF!	#REF!	#REF!
#REF!	#REF!	#REF!	#REF!	#REF!	#REF!	#REF!
#REF!	#REF!	#REF!	#REF!	#REF!	#REF!	#REF!
#REF!	#REF!	#REF!	#REF!	#REF!	#REF!	#REF!
#REF!	#REF!	#REF!	#REF!	#REF!	#REF!	#REF!
#REF!	#REF!	#REF!	#REF!	#REF!	#REF!	#REF!
#REF!	#REF!	#REF!	#REF!	#REF!	#REF!	#REF!
#REF!	#REF!	#REF!	#REF!	#REF!	#REF!	#REF!
#REF!	#REF!	#REF!	#REF!	#REF!	#REF!	#REF!
#REF!	#REF!	#REF!	#REF!	#REF!	#REF!	#REF!
#REF!	#REF!	#REF!	#REF!	#REF!	#REF!	#REF!
#REF!	#REF!	#REF!	#REF!	#REF!	#REF!	#REF!

## Sheet: terms
Low
High
Some concerns
Favours experimental
Favours comparator
Towards null
Away from null
Unpredictable
Yes
Probably yes
Probably no
No
No information
Not applicable
RCT
Cluster-randomized trials
Other matched designs.
Population
Intervention
Control
Outcome
Study
Low
Moderate
Serious
Critical
NI
