# Supplementary material
Source: publisher figshare collection journal article supplement (https://tandf.figshare.com/articles/dataset/_/11952384)
Supplement: Supplementary file 1 [file 1 › iart_a_1729753_sm4059.pdf]

## Supplementary 4 - Studies with high risk of bias

### Reference

Auer M, Malischnig D, Griffiths M. Is “pop-up” messaging in online slot machine gambling effective as a responsible gambling strategy? *Journal of Gambling Issues*, 2014; 291-10.

Jardin B, Wulfert E. The use of messages in altering risky gambling behavior in college students: an experimental analogue study. *Am J Addict*, 2009; 18 (3): 243-7.

Kotter R, Kraplin A, Buhringer G. Casino Self- and Forced Excluders' Gambling Behavior Before and After Exclusion. *J Gambl Stud*, 2018; 34 (2): 597-615.

Ladouceur R, Ferland F, Vitaro F, Pelletier O. Modifying youths' perception toward pathological gamblers. *Addictive Behaviors* 2005;30:351-354.

Ladouceur R, Sylvain C, Gosselin P. Self-exclusion program: a longitudinal evaluation study. *J Gambl Stud*, 2007; 23 (1): 85-94.

Nelson SE, Kleschinsky JH, LaBrie RA, Kaplan S, Shaffer HJ. One decade of self exclusion: Missouri casino self-excluders four to ten years after enrollment. *J Gambl Stud*, 2010; 26 (1): 129-44.

Stewart MJ, Wohl MJ. Pop-up messages, dissociation, and craving: how monetary limit reminders facilitate adherence in a session of slot machine gambling. *Psychol Addict Behav*, 2013; 27 (1): 268-73.

Turner N, Macdonald J, Bartoshuk M, Zangeneh M. The evaluation of a 1-h prevention program for problem gambling. *International Journal of Mental Health and Addiction* 2008;6:238-243.

Wohl MJ, Christie KL, Matheson K, Anisman H. Animation-based education as a gambling prevention tool: correcting erroneous cognitions and reducing the frequency of exceeding limits among slots players. *J Gambl Stud*, 2010; 26 (3): 469-86.
