# Supplementary material
Source: publisher figshare collection journal article supplement (https://tandf.figshare.com/articles/dataset/_/11952384)
Supplement: Supplementary file 1 [file 1 › iart_a_1729753_sm4061.pdf]

## Supplementary 6 – Meta-analysis

The effect of long educational intervention. Outcome: gambling frequency, follow up 2-4 months.

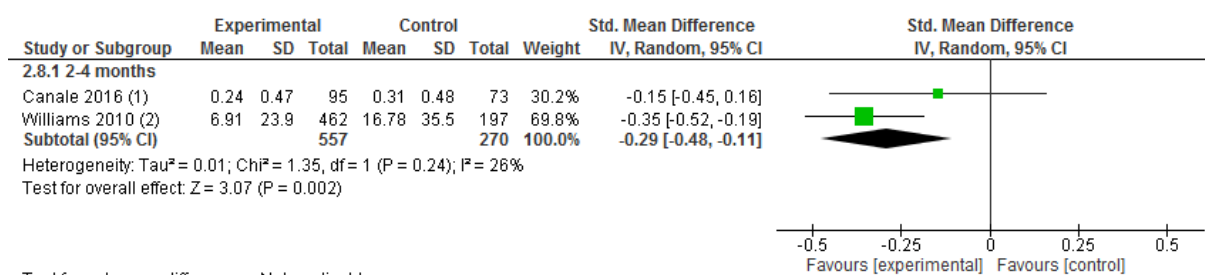

### Footnotes

- (1) Authors contacted to get mean and SD: gambling days per 30 days  
 (2) gambling days per 90 days

PN compared to control (no intervention). Changes in the severity of problem gambling among university students at 3 and 6 months follow-up.

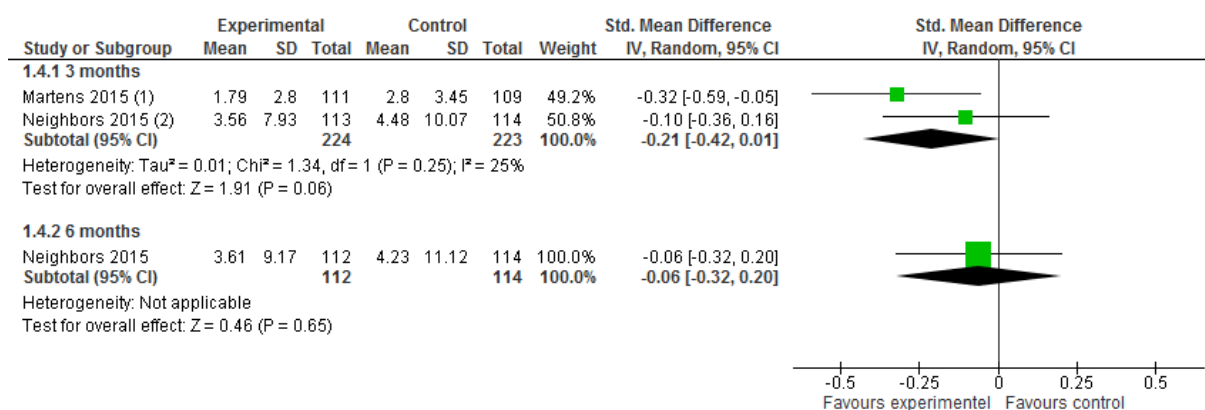

### Footnotes

- (1) CPGL (0-4 low risk, 5-7 moderate, 8- high risk)  
 (2) SOGS (max score 20)

## PN compared to no intervention. Outcome: Gambling frequency.

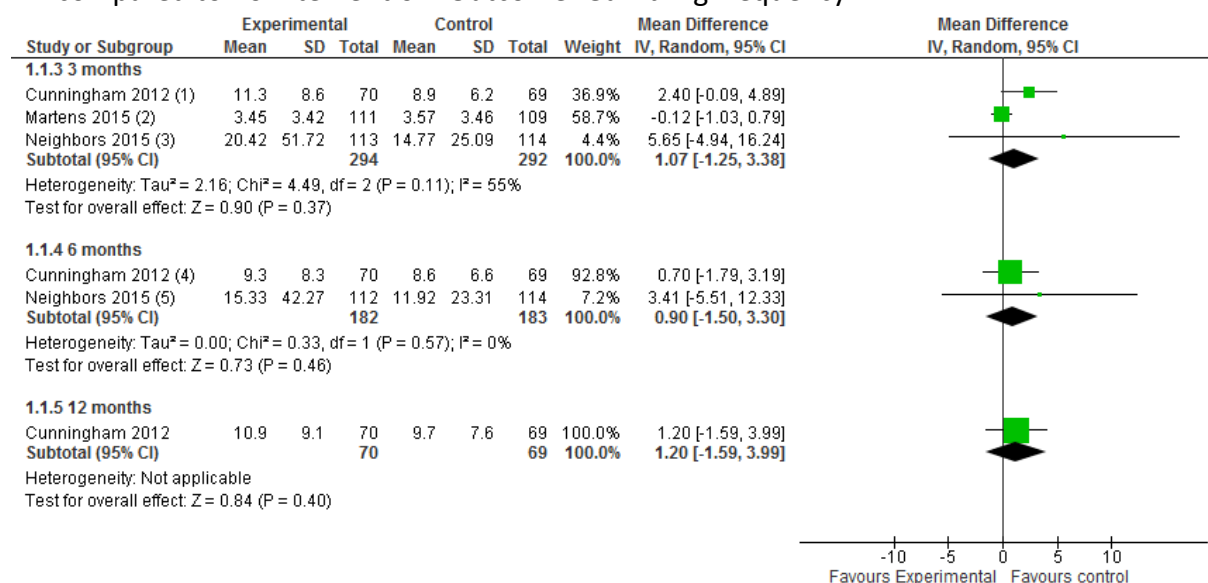

### Footnotes

- (1) days gambled the last 30 days  
 (2) days gambled preceding 60 days.  
 (3) days gambled the past year  
 (4) days gambled the last 30 days  
 (5) days gambled the past year

## PN compared to no intervention. Outcome: dollar lost/loss

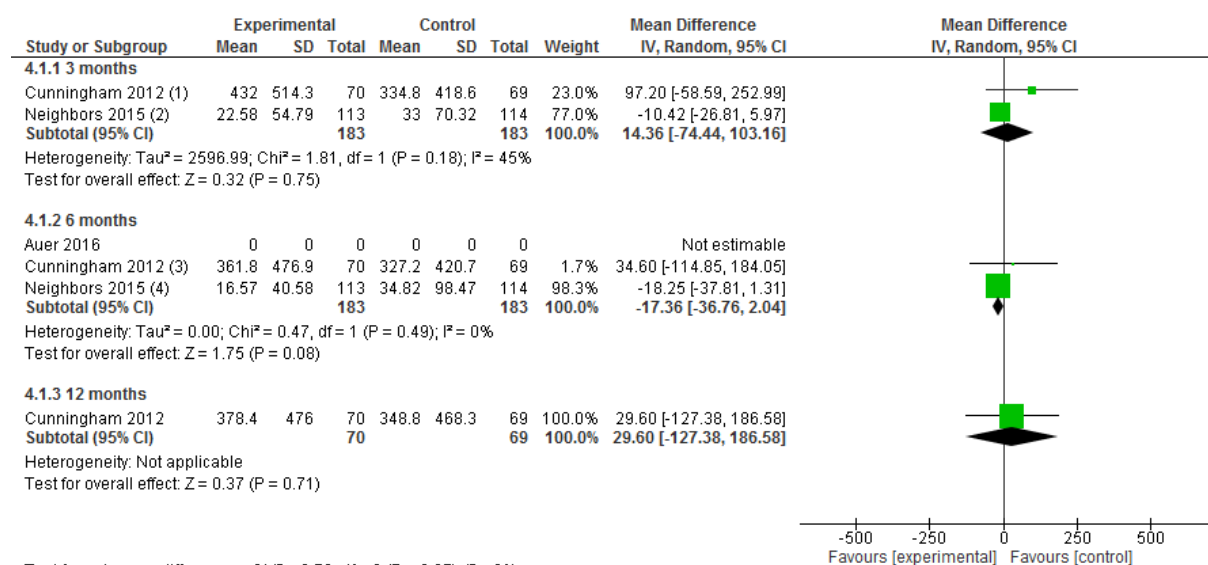

Test for subgroup differences:  $\chi^2 = 0.79$ ,  $df = 2$  ( $P = 0.67$ ),  $I^2 = 0\%$

### Footnotes

- (1) total dollar spent past 30 days  
 (2) quantity loss  
 (3) total dollar spent past 30 days  
 (4) quantity loss

Pop up message. Outcome: Number of spins during the gambling session for people who gambled on slot machines (post intervention).

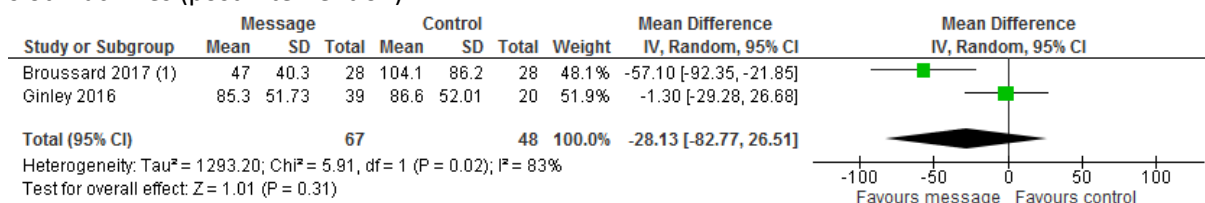

#### Footnotes

(1) unclear from the study how many participants in each group. we assume that it was equal
